# Supplementary material for: Improved synthesis of the bifunctional chelator p-SCN-Bn-HOPO
Source: Royal Society of Chemistry journal article supplement (doi:10.1039/c9ob01068h), 2019-01-01
Supplement: c9ob01068h1.pdf [file c9ob01068h1.pdf]

## Improved Synthesis of the Bifunctional Chelator p-SCN-Bn-HOPO

N. V. S. Dinesh K. Bhupathiraju,<sup>a\*</sup> Ali Younes,<sup>a</sup> Minhua Cao,<sup>a</sup> Jafar Ali,<sup>a</sup> Huseyin T. Cicek,<sup>a</sup> Kathryn M. Tully,<sup>b,c</sup> Shashikanth Ponnala,<sup>d</sup> John W. Babich,<sup>d</sup> Melissa A. Deri,<sup>e,f</sup> Jason S. Lewis,<sup>b,c</sup> Lynn C. Francesconi,<sup>a,f</sup> Charles Michael Drain<sup>a,f</sup>

<sup>a</sup> Department of Chemistry, Hunter College of the City University of New York, New York, New York 10065 USA

<sup>b</sup> Department of Pharmacology, Weill Cornell Medicine, New York, NY 10065, USA

<sup>c</sup> Department of Radiology, the Program in Pharmacology, and the Radiochemistry and Molecular Imaging Probes Core, Memorial Sloan Kettering Cancer Center, New York, New York 10065, USA

<sup>d</sup> Radiopharmaceutical Sciences and Department of Radiology, Weill Cornell Medicine, New York, NY, USA

<sup>e</sup> Lehman College of the City University of New York, Bronx, New York 10468

<sup>f</sup> Chemistry Program, Graduate Center of the City University of New York, New York, New York 10016 USA.

\* [nb216@hunter.cuny.edu](mailto:nb216@hunter.cuny.edu)

|                                                                       |    |
|-----------------------------------------------------------------------|----|
| Synthesis of tosylated reagent (Scheme S1 and experimental procedure) | 2  |
| Flash chromatograms                                                   | 3  |
| Microwave synthesis trials of compound 4 (Table S1)                   | 4  |
| NMR (nuclear magnetic resonance)                                      | 5  |
| MS (mass spectrometry)                                                | 15 |
| LC-MS ILiquid chromatography–mass spectrometry)                       | 22 |
| Author contributions statement                                        | 23 |

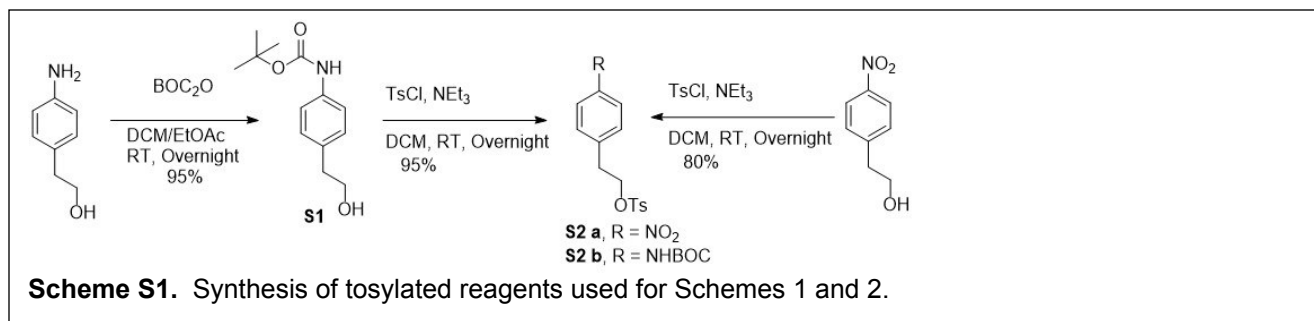

#### Synthesis of 2-(4-tertiarybutyl-aminophenyl)ethan-1-ol (**S1**) :

To 2-(4-aminophenyl)ethan-1-ol (13.7 g, 0.1 mol) in 750 mL dichloromethane was added di-tert-butyl decarbonate (43.6 g, 0.2 mol) in 750 mL dichloromethane dropwise using dropping funnel at 0°C. Then the reaction mixture was stirred at room temperature overnight. Then the solvent was evaporated under vacuum. The crude mixture is dissolved in 200 mL dichloromethane and extracted with brine using a separatory funnel. The organic layer was dried over Na<sub>2</sub>SO<sub>4</sub>, and evaporated to dryness to obtain crude product, which was purified using silica column chromatography eluting with 95:5 (DCM:EtOAc) resulted **S1** in 95% yield (22.6 g, 0.095 mol).

<sup>1</sup>H NMR (400 MHz, CDCl<sub>3</sub>) δ 7.26 (d, *J*=7.6 Hz, 2H), 7.10 (d, *J*=8.36 Hz, 2H), 6.57 (s, 2H), 3.77 (t, *J*=6.56 Hz, 2H), 2.77 (t, *J*=6.56 Hz, 2H), 1.74 (s, 1H), 1.48 (s, 9H); <sup>13</sup>C NMR (100 MHz, CDCl<sub>3</sub>) δ; 153.06, 136.85, 133.16, 129.67, 119.02, 80.62, 63.85, 36.56, 28.47; HRMS (ESI) *m/z* calcd for C<sub>13</sub>H<sub>19</sub>NO<sub>3</sub> ([M + H]<sup>+</sup>), 238.1443, found 238.1434; C<sub>13</sub>H<sub>19</sub>NO<sub>3</sub> ([M + Na]<sup>+</sup>), 260.1263, found 260.1263.

#### 4-nitrophenethyl 4-methylbenzenesulfonate (**S2a**):

To a solution of 2-(4-nitrophenyl)ethanol (2.07 g, 12.4 mmol) and triethyl amine (5.85 g, 57.8 mmol) in dichloromethane (80 mL) was added p-toulnesulfonylchloride (2.36 g, 12.4 mmol) in THF (60 mL) drop wise at 0°C under N<sub>2</sub>. The resulting solution was stirred at room temperature for overnight. Then the solvent was evaporated under reduced pressure. The resulting residue was dissolved in methylene chloride, washed with water, dried over anhydrous sodium sulfate, and evaporated to dryness. The crude compound was purified by silica column chromatography using hexane:DCM 30:70 as eluent to obtain white yellowish solid. Yield: 80%. (3.18 g, 9.91 mmol)

<sup>1</sup>H NMR (400 MHz, CDCl<sub>3</sub>) δ 8.10 (d, *J*=10.9 Hz, 2H), 7.67 (d, 7.10 *J*=10.35 Hz, 2H), 7.27-7.30 (m, 4H), 4.29 (t, *J*=8 Hz, 2H), 3.08 (t, *J*=8 Hz, 2H), 2.44 (s, 3H); <sup>13</sup>C NMR (100 MHz, CDCl<sub>3</sub>) δ; 147.22, 145.26, 144.37, 132.87, 130.02, 129.98, 127.98, 127.23, 123.92, 69.61, 42.19, 35.30, 21.79, 14.33;

HRMS (ESI) *m/z* calcd for C<sub>15</sub>H<sub>15</sub>NO<sub>5</sub>S ([M + H]<sup>+</sup>), 322.07, found 322.076; C<sub>15</sub>H<sub>15</sub>NO<sub>5</sub>S ([M + Na]<sup>+</sup>), 344.04, found 344.056.

#### Synthesis of 2-(4-tertiarybutyl aminophenyl)ethyl 4-methylbenzenesulfonate (**S2b**):

To compound **S1** (2.37 g, 10 mmol) in 75 mL dichloromethane and triethyl amine (3.3 g, 33 mmol) was added p-toulnesulfonylchloride (2 g, 10.5 mmol) in 50 mL THF dropwise using dropping funnel at 0°C. Then the reaction mixture is stirred at room temperature for overnight. Then the solvent was evaporated under vacuum. The obtained product **S2b** (3.7 g) 95% was used in next step without further purification. There is about 5% of unreacted compound **S1** (monitored via TLC using DCM:Hexanes 3:1). Column purification results in degradation of compound **S2b** to compound **S1** so it is not ideal to run the mixture through a silica column.

<sup>1</sup>H NMR (600 MHz, CDCl<sub>3</sub>) δ 7.63 (d, *J*=8.34 Hz, 2H), 7.23 (d, *J*=8.04 Hz, 2H), 7.19 (d, *J*=7.98, 2H), 6.96 (d, *J*=8.58, 2H), 6.49 (s, 1H), 4.11 (t, *J*=7.14 Hz, 2H), 2.84 (t, *J*=7.08 Hz, 2H), 2.38 (s, 3H), 1.47 (s, 9H); <sup>13</sup>C NMR (150 MHz, CDCl<sub>3</sub>) δ; 152.75,

144.73, 137.20, 132.80, 129.81, 129.43, 127.83, 127.04, 118.65, 80.53, 70.77, 42.01, 34.65, 28.35, 21.65, 14.17; HRMS (ESI)  $m/z$  calcd for  $C_{20}H_{25}NO_5S$  ( $[M + H]^+$ ), 392.1532, found 392.1534;  $C_{20}H_{25}NO_5S$  ( $[M + Na]^+$ ), 414.1351, found 414.135.

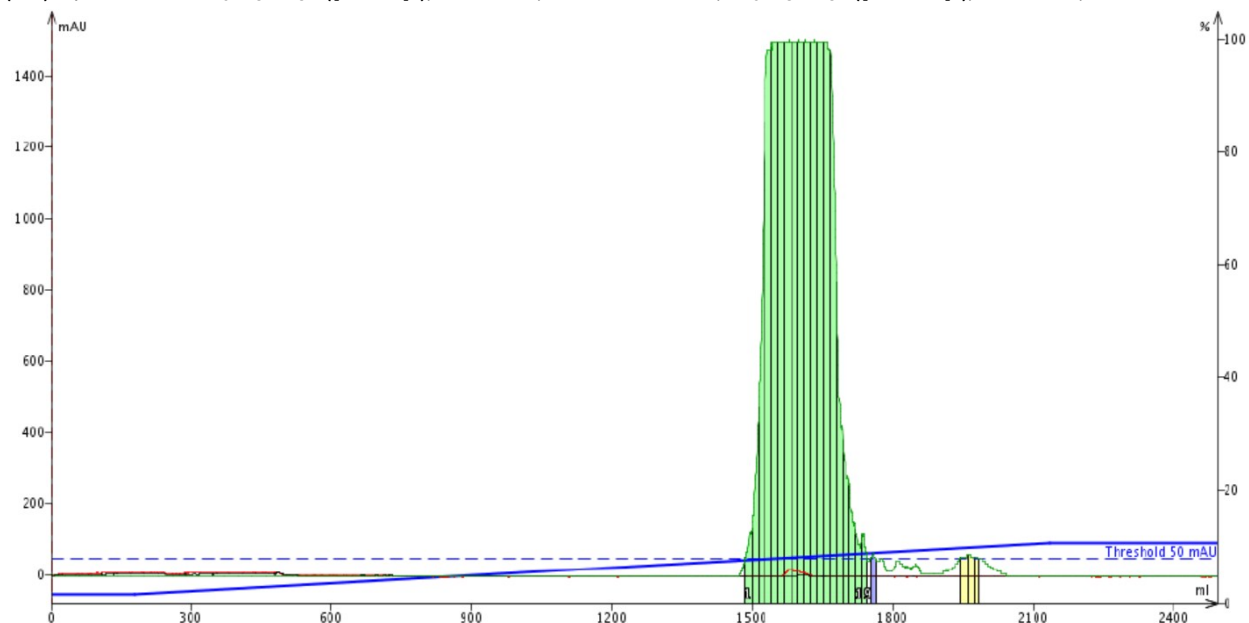

**Figure S1.** Flash chromatography purification of compound **4** using an eluent of DCM: MeOH over a SNP-silica gel column.

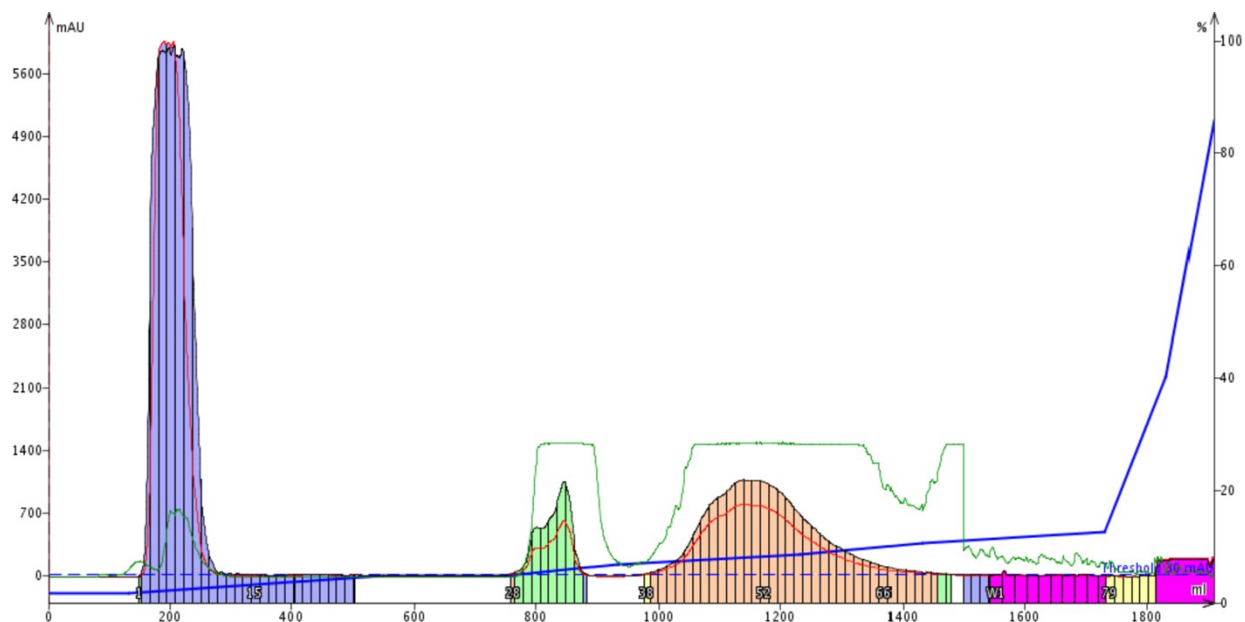

**Figure S2:** Flash purification of compound **5** using an eluent of DCM: MeOH over a SNP-silica gel column.

| Trial   | 4-nitrophenylethyl-bromide equiv. | K <sub>2</sub> CO <sub>3</sub> equiv. | compound 3 (g) | Time  | Power | Temp °C   | % yield |
|---------|-----------------------------------|---------------------------------------|----------------|-------|-------|-----------|---------|
| A3S4-O1 | 1                                 | 5                                     | 0.2            | 5min  | 50 W  | 25->40 °C | 3.1     |
|         |                                   |                                       |                | 1h    | 25 W  | 40 °C     |         |
|         |                                   |                                       |                | 10min | 25 W  | 40->25 °C |         |
| A3S4-O2 | 2                                 | 5                                     | 0.2            | 5min  | 50 W  | 25->40 °C | 3.5     |
|         |                                   |                                       |                | 1h    | 25 W  | 40 °C     |         |
|         |                                   |                                       |                | 10min | 25 W  | 40->25 °C |         |
| A3S4-O3 | 3                                 | 5                                     | 0.3            | 5min  | 50 W  | 25->40 °C | 12.3    |
|         |                                   |                                       |                | 1h    | 25 W  | 40 °C     |         |
|         |                                   |                                       |                | 10min | 25 W  | 40->25 °C |         |
| A3S4-O4 | 4                                 | 5                                     | 0.3            | 5min  | 50 W  | 25->40 °C | 2.3     |
|         |                                   |                                       |                | 1h    | 25 W  | 40 °C     |         |
|         |                                   |                                       |                | 10min | 25 W  | 40->25 °C |         |

**Table S1.** Microwave reaction for the synthesis of tert-butyl (4-((tert-butoxycarbonyl)(3-((4-nitrophenethyl)amino)propyl)amino)butyl)(3-((tert-butoxycarbonyl)amino)propyl)carbamate (**4**, Scheme 2)

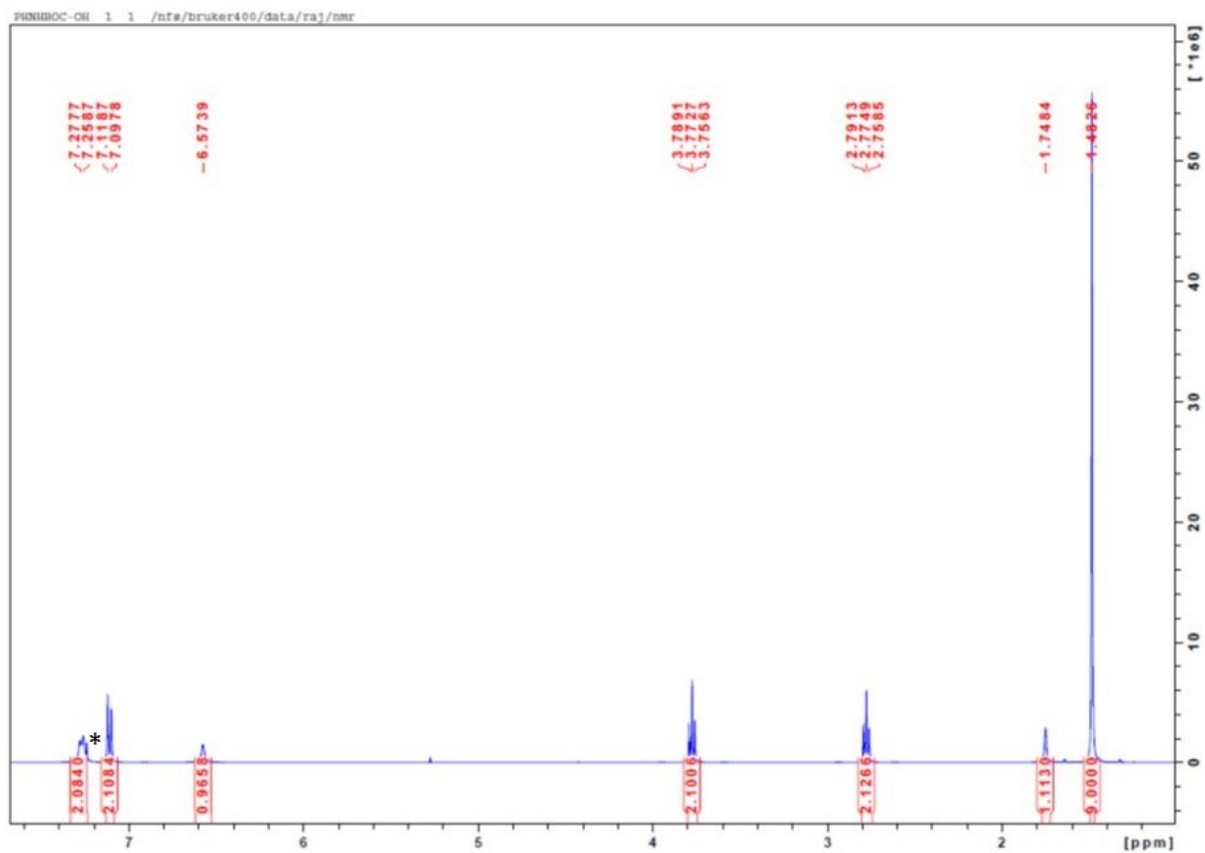

Figure S3.  $^1\text{H}$  NMR of compound **S1** in  $^*\text{CDCl}_3$ .

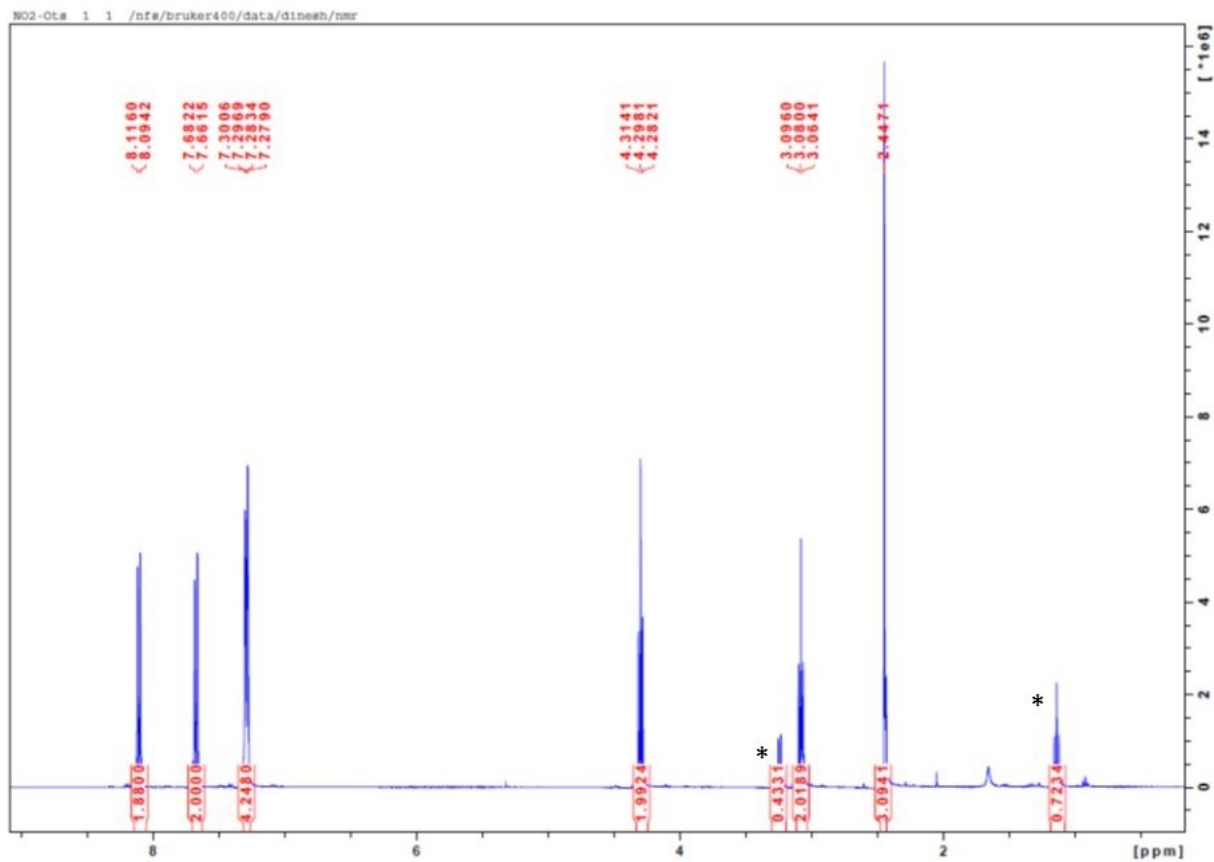

**Figure S4.**  $^1\text{H}$  NMR of compound **S2a** in  $\text{CDCl}_3$ , \* ethylacetate.

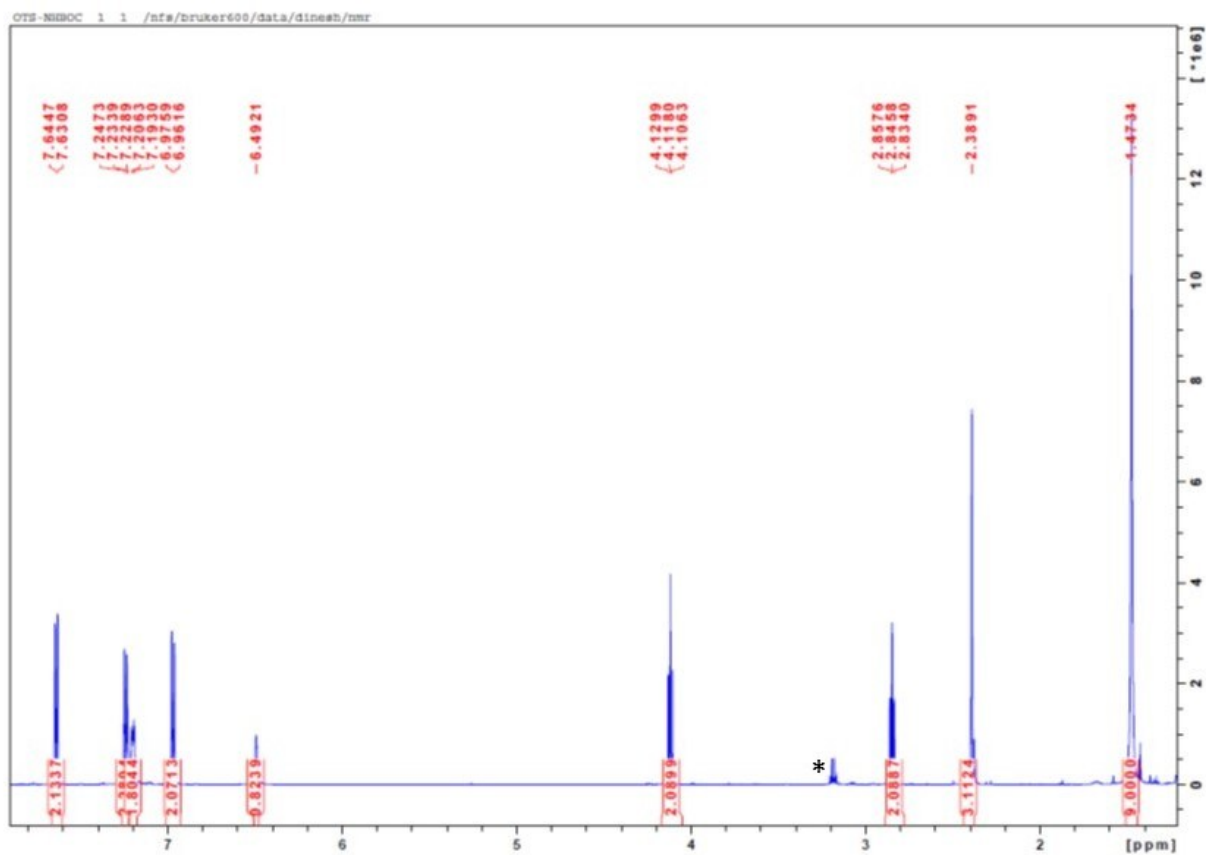

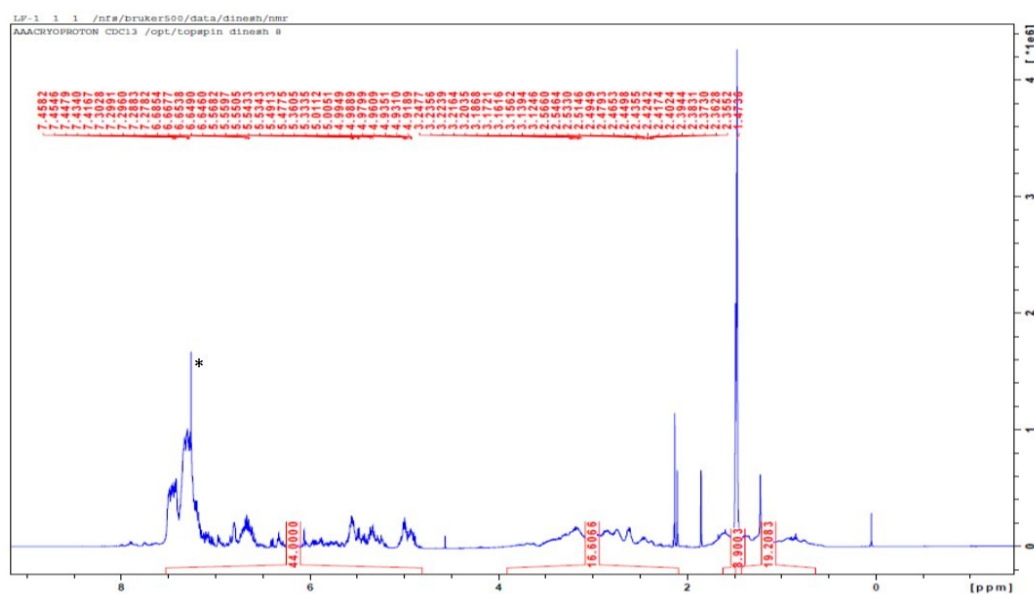

**Figure S6.**  $^1\text{H}$  NMR of compound **1** in  $^*\text{CDCl}_3$ .



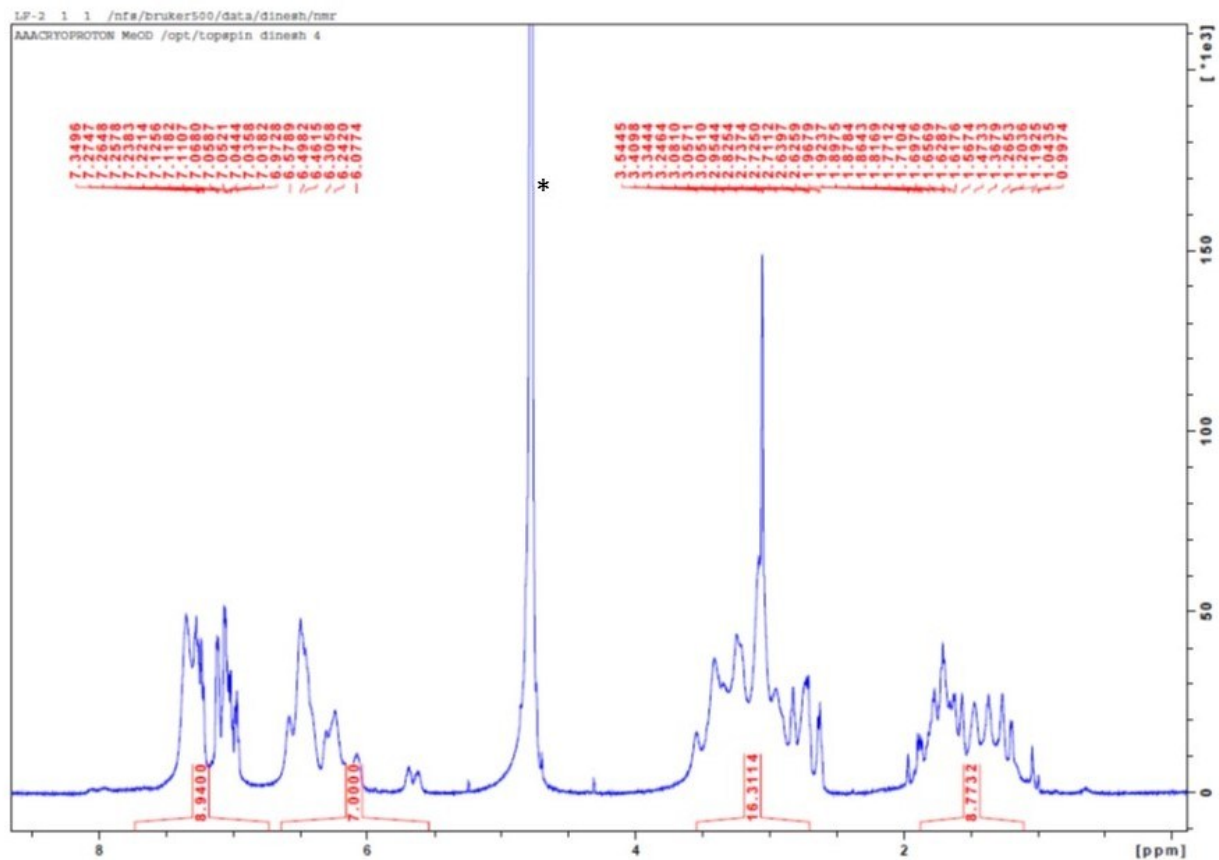

**Figure S7.**  $^1\text{H}$  NMR of compound **2** in  $\text{CD}_3\text{OD}^*$

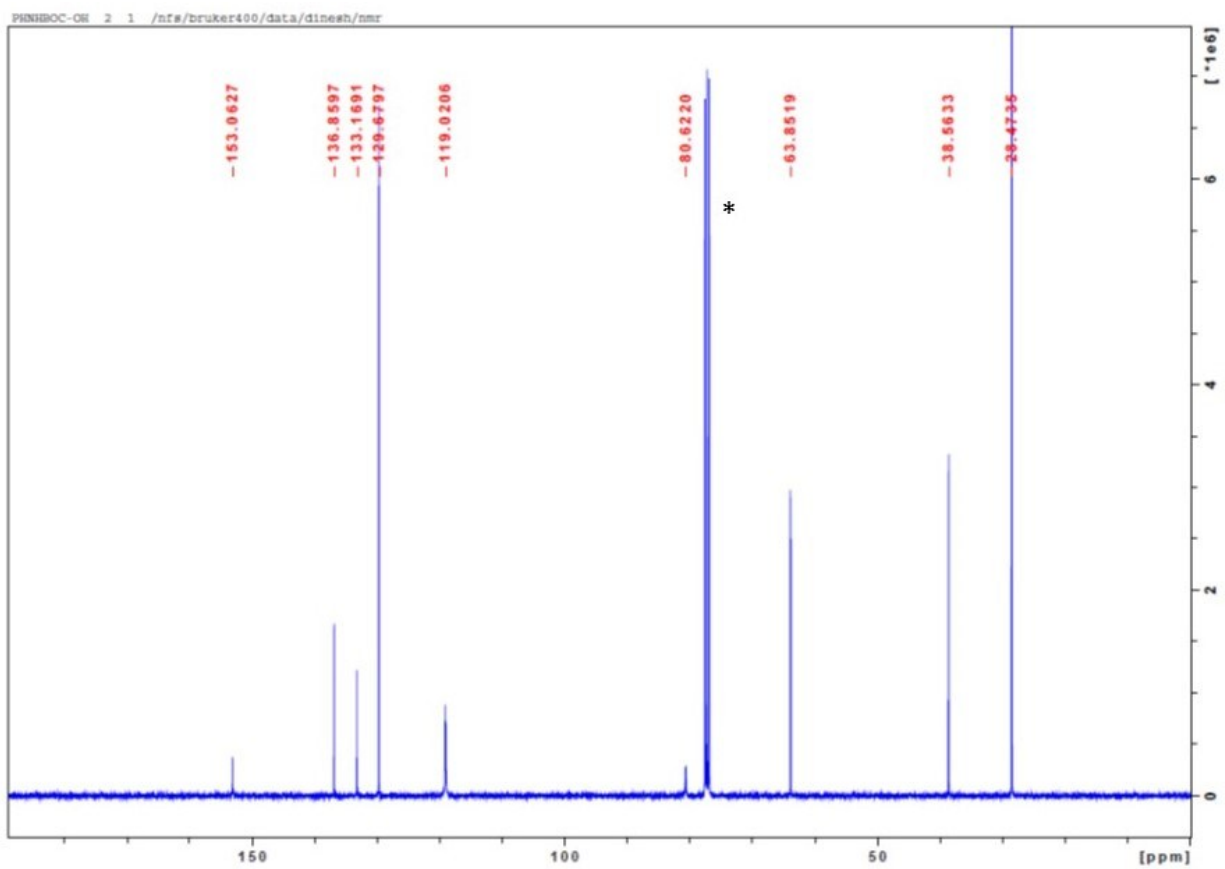

**Figure S8.**  $^{13}\text{C}$  NMR of compound **S1** in  $^*\text{CDCl}_3$ .

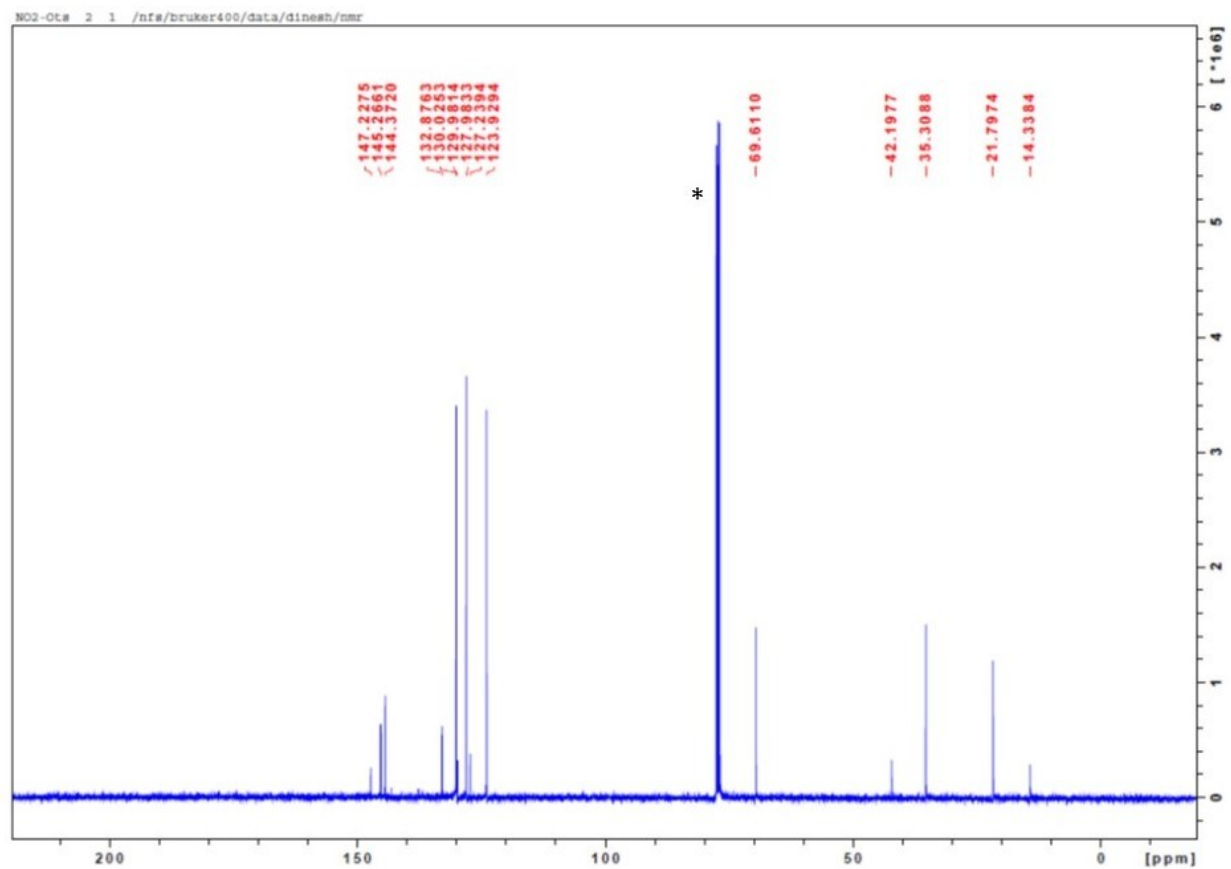

**Figure S9.**  $^{13}\text{C}$  NMR of compound **S2a** in  $^*\text{CDCl}_3$ .

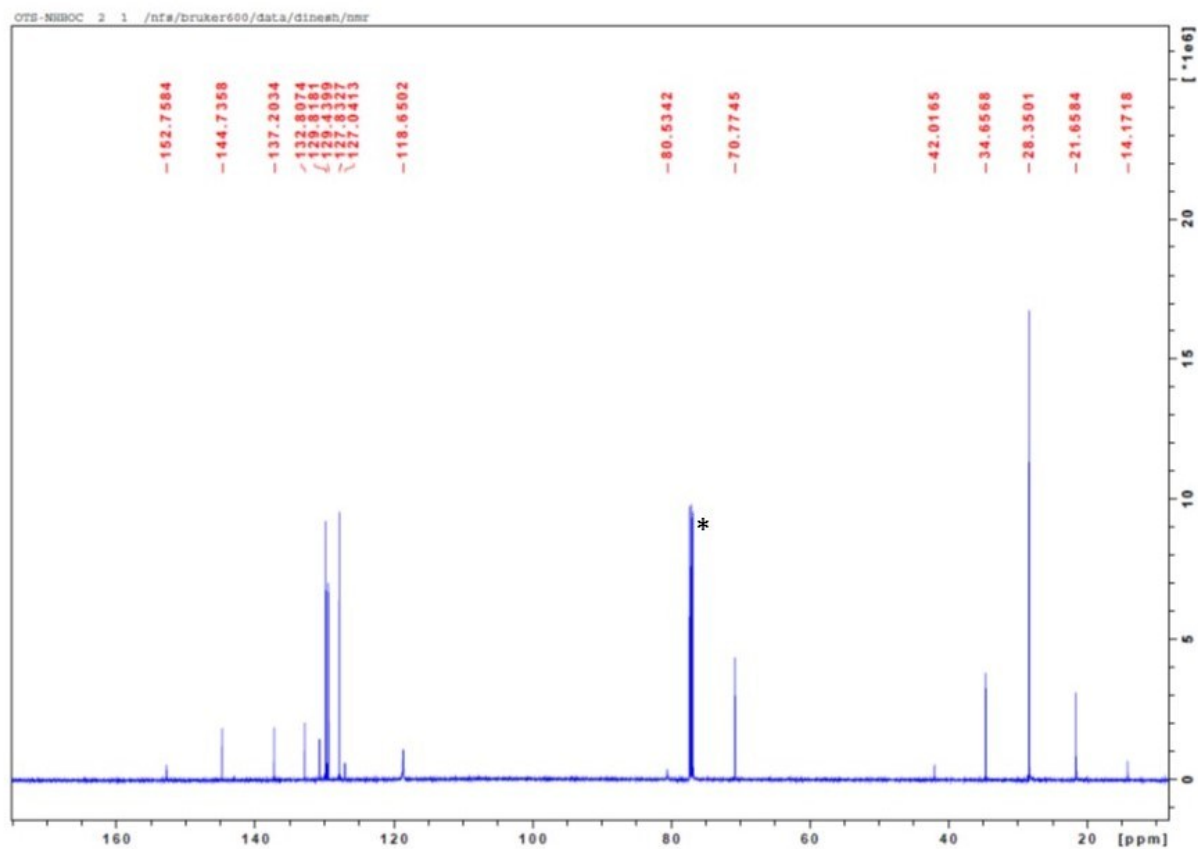

**Figure S10.**  $^{13}\text{C}$  NMR of compound **S2b** in  $^*\text{CDCl}_3$ .

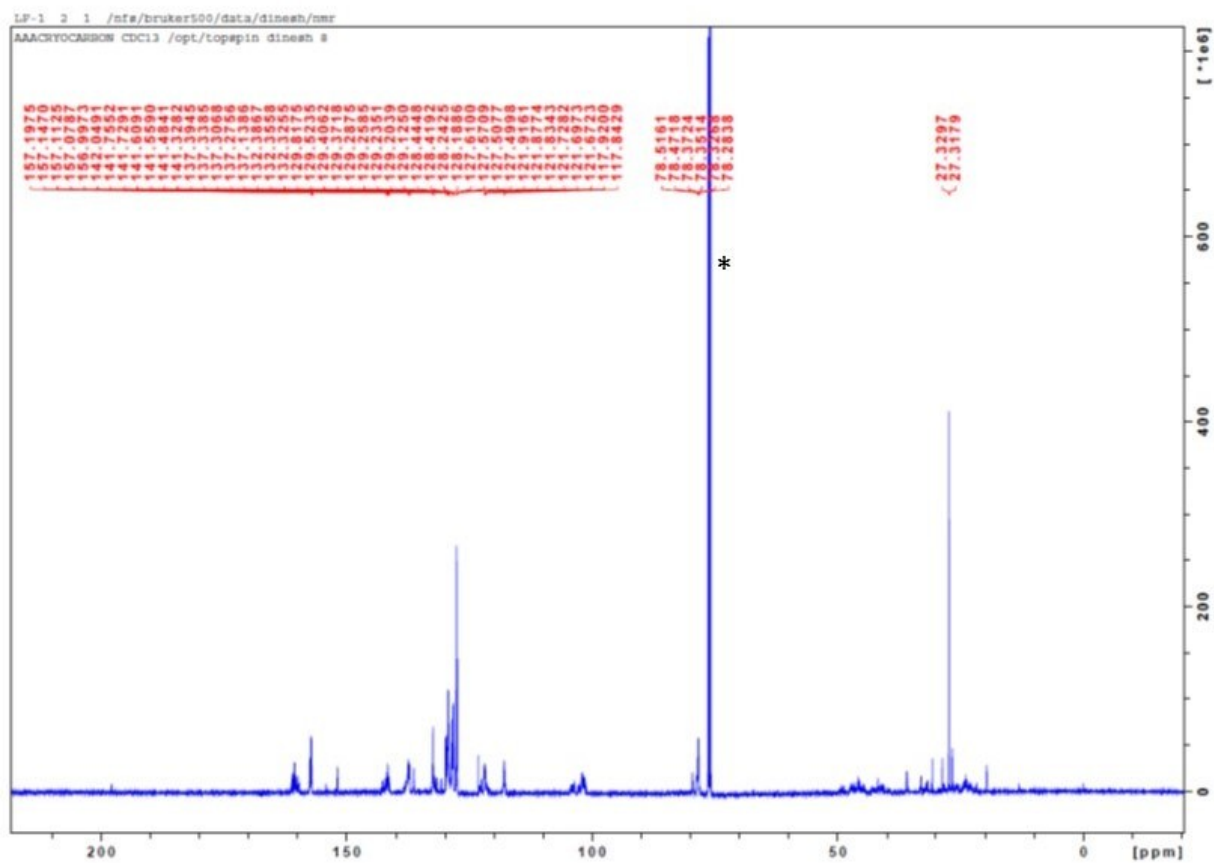

**Figure S11.**  $^{13}\text{C}$  NMR of Compound 1 in  $^*\text{CDCl}_3$ .

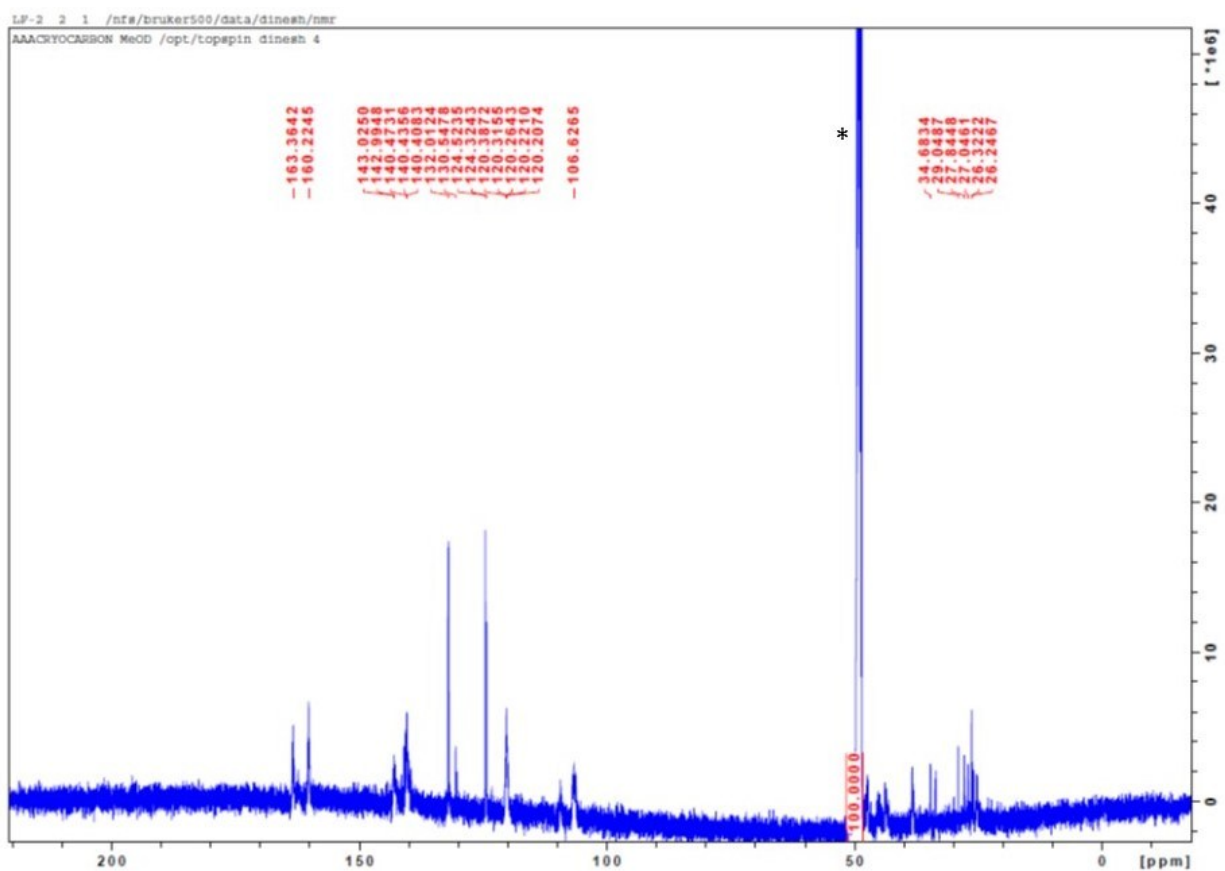

**Figure S12.**  $^{13}\text{C}$  NMR of compound **2** in  $^*\text{CD}_3\text{OD}$

Compound Table

| Compound Label      | RT    | Mass     | Abund  | Formula      | Tgt Mass | Diff (ppm) |
|---------------------|-------|----------|--------|--------------|----------|------------|
| Cpd 1: C13 H19 N O3 | 0.137 | 237.1371 | 259480 | C13 H19 N O3 | 237.1365 | 2.56       |

MS Zoomed Spectrum

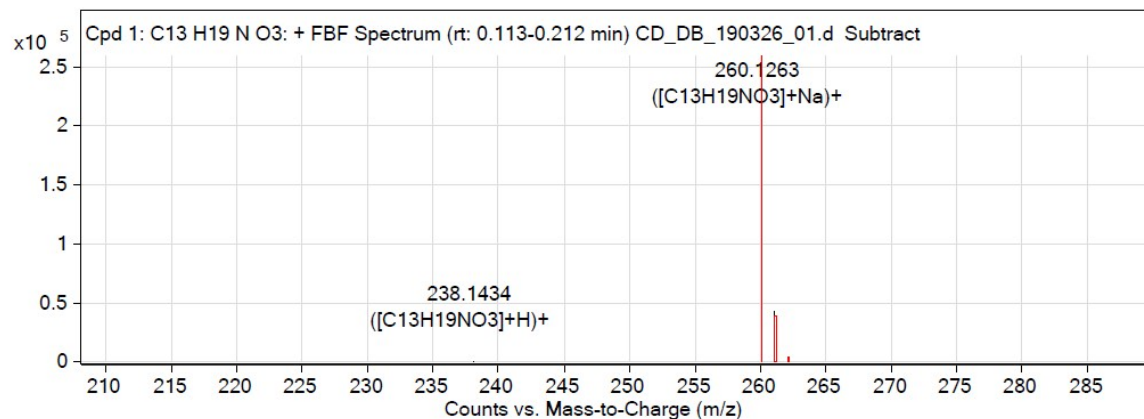

MS Spectrum Peak List

| m/z      | z | Abund     | Formula   | Ion     |
|----------|---|-----------|-----------|---------|
| 238.1434 | 1 | 363.05    | C13H19NO3 | (M+H)+  |
| 260.1263 | 1 | 259480.03 | C13H19NO3 | (M+Na)+ |
| 261.1298 | 1 | 42344.59  | C13H19NO3 | (M+Na)+ |
| 262.1323 | 1 | 4623.75   | C13H19NO3 | (M+Na)+ |

Figure S13. HRMS of Compound S1

Compound Table

| Compound Label        | RT    | Mass     | Abund  | Formula        | Tgt Mass | Diff (ppm) |
|-----------------------|-------|----------|--------|----------------|----------|------------|
| Cpd 1: C20 H25 N O5 S | 0.118 | 391.1458 | 854402 | C20 H25 N O5 S | 391.1453 | 1.13       |

MS Zoomed Spectrum

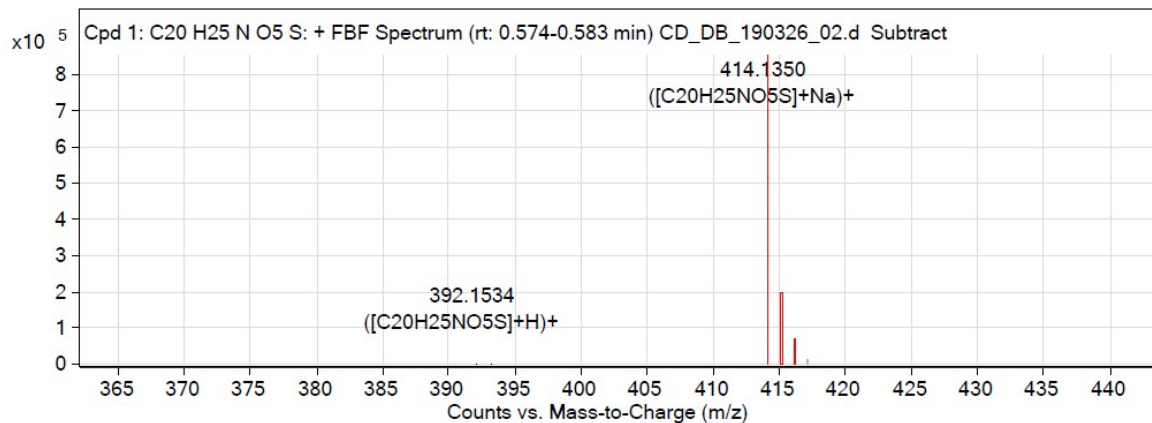

MS Spectrum Peak List

| m/z      | z | Abund     | Formula    | Ion     |
|----------|---|-----------|------------|---------|
| 392.1534 | 1 | 1202.18   | C20H25NO5S | (M+H)+  |
| 393.1643 | 1 | 156       | C20H25NO5S | (M+H)+  |
| 414.135  | 1 | 854401.63 | C20H25NO5S | (M+Na)+ |
| 415.1381 | 1 | 175544.03 | C20H25NO5S | (M+Na)+ |
| 416.1357 | 1 | 49103.63  | C20H25NO5S | (M+Na)+ |

Figure S14. HRMS of Compound S2b

Compound Table

| Compound Label       | RT    | Mass    | Abund  | Formula       | Tgt Mass | Diff (ppm) | MFG Formula   | DB Formula    |
|----------------------|-------|---------|--------|---------------|----------|------------|---------------|---------------|
| Cpd 1: C23 H43 N5 O2 | 0.038 | 421.341 | 127973 | C23 H43 N5 O2 | 421.3417 | -1.68      | C23 H43 N5 O2 | C23 H43 N5 O2 |

| Compound Label       | m/z      | RT    | Algorithm       | Mass    |
|----------------------|----------|-------|-----------------|---------|
| Cpd 1: C23 H43 N5 O2 | 422.3483 | 0.038 | Find By Formula | 421.341 |

MS Spectrum

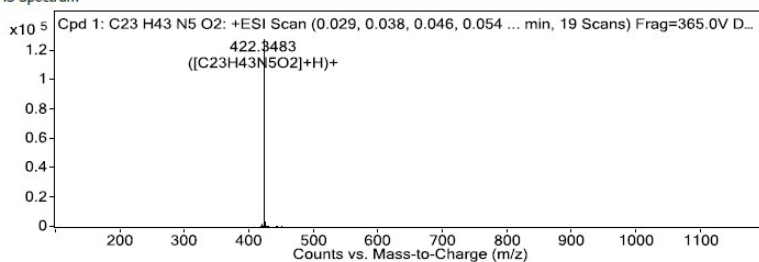

MS Zoomed Spectrum

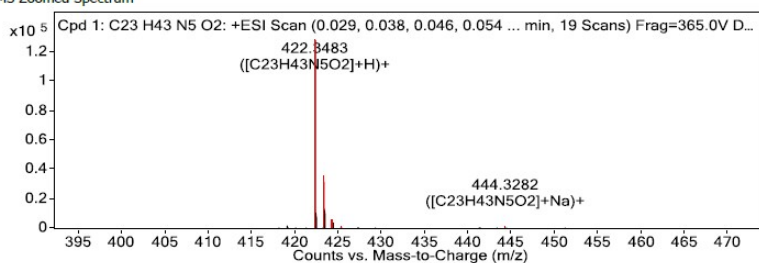

MS Spectrum Peak List

| m/z      | Calc m/z | Diff(ppm) | z | Abund     | Formula    | Ion     |
|----------|----------|-----------|---|-----------|------------|---------|
| 422.3483 | 422.349  | 1.44      | 1 | 127973.05 | C23H43N5O2 | (M+H)+  |
| 423.351  | 423.3519 | 2.31      | 1 | 32352.66  | C23H43N5O2 | (M+H)+  |
| 424.3538 | 424.3547 | 2.28      | 1 | 4210.75   | C23H43N5O2 | (M+H)+  |
| 425.3568 | 425.3574 | 1.53      | 1 | 439.63    | C23H43N5O2 | (M+H)+  |
| 444.3282 | 444.3309 | 6.13      | 1 | 555.23    | C23H43N5O2 | (M+Na)+ |
| 445.3313 | 445.3339 | 5.7       | 1 | 122.12    | C23H43N5O2 | (M+Na)+ |
| 446.3169 | 446.3367 | 44.37     | 1 | 69.03     | C23H43N5O2 | (M+Na)+ |

Figure S15. HRMS of Spermine mono Ph-NHBOC (Intermediate for compound 1)



Compound Table

| Compound Label        | RT    | Mass      | Abund  | Formula        | Tgt Mass  | Diff (ppm) |
|-----------------------|-------|-----------|--------|----------------|-----------|------------|
| Cpd 1: C75 H79 N9 O14 | 5.821 | 1329.5747 | 720544 | C75 H79 N9 O14 | 1329.5746 | 0.07       |

MS Zoomed Spectrum

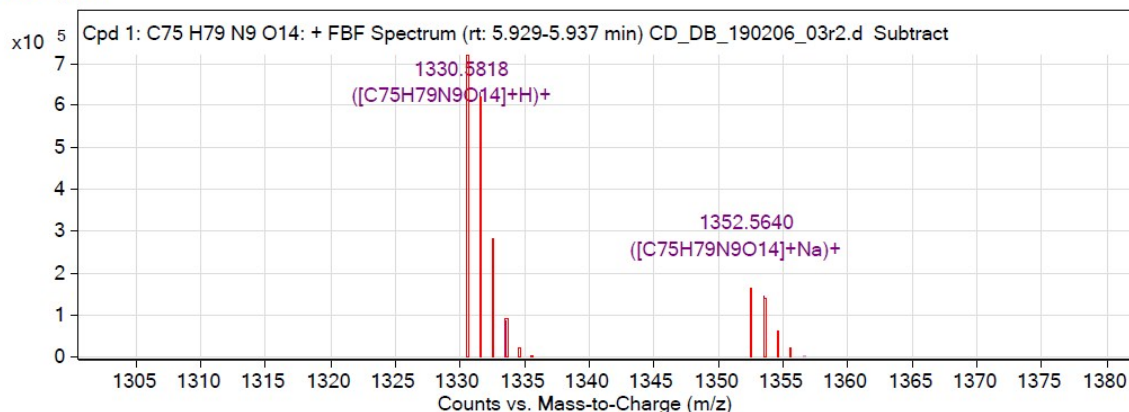

MS Spectrum Peak List

| m/z       | z | Abund     | Formula     | Ion     |
|-----------|---|-----------|-------------|---------|
| 1330.5818 | 1 | 720544.25 | C75H79N9O14 | (M+H)+  |
| 1331.5852 | 1 | 631059.25 | C75H79N9O14 | (M+H)+  |
| 1332.5889 | 1 | 273066.38 | C75H79N9O14 | (M+H)+  |
| 1333.5906 | 1 | 85510.94  | C75H79N9O14 | (M+H)+  |
| 1334.5927 | 1 | 20738.16  | C75H79N9O14 | (M+H)+  |
| 1335.5927 | 1 | 4785.6    | C75H79N9O14 | (M+H)+  |
| 1352.564  | 1 | 162156    | C75H79N9O14 | (M+Na)+ |
| 1353.5673 | 1 | 145619.59 | C75H79N9O14 | (M+Na)+ |
| 1354.5696 | 1 | 64523.8   | C75H79N9O14 | (M+Na)+ |
| 1355.5724 | 1 | 20166.56  | C75H79N9O14 | (M+Na)+ |

Figure S16. HRMS of compound 1

Compound Table

| Compound Label        | RT   | Mass     | Abund | Formula        | Tgt Mass | Diff (ppm) |
|-----------------------|------|----------|-------|----------------|----------|------------|
| Cpd 1: C42 H47 N9 O12 | 3.33 | 869.3298 | 68297 | C42 H47 N9 O12 | 869.3344 | -5.36      |

MS Zoomed Spectrum

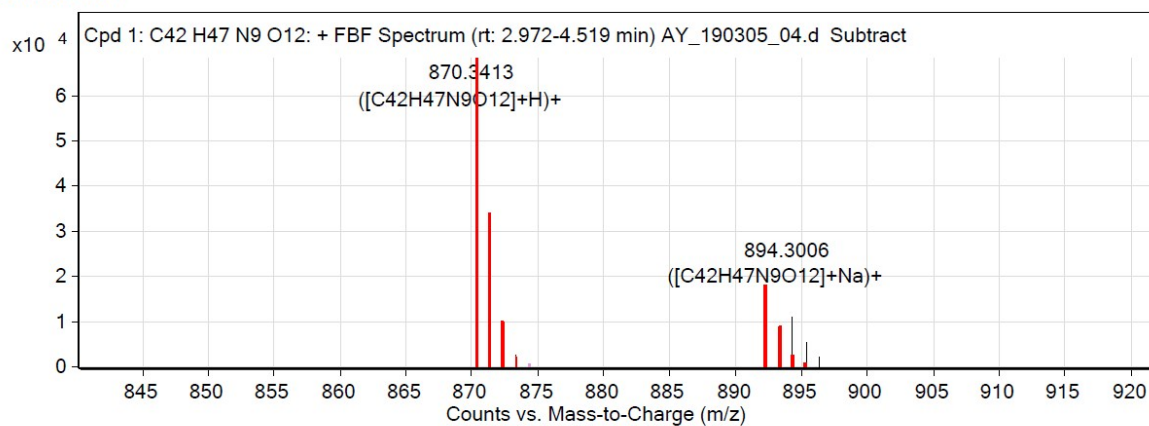

MS Spectrum Peak List

| m/z      | z | Abund    | Formula     | Ion     |
|----------|---|----------|-------------|---------|
| 870.3413 | 1 | 68297.38 | C42H47N9O12 | (M+H)+  |
| 871.344  | 1 | 33455.82 | C42H47N9O12 | (M+H)+  |
| 872.3469 | 1 | 9982.67  | C42H47N9O12 | (M+H)+  |
| 873.3492 | 1 | 2310.85  | C42H47N9O12 | (M+H)+  |
| 892.3181 | 1 | 7168.24  | C42H47N9O12 | (M+Na)+ |
| 893.3166 | 1 | 4341.65  | C42H47N9O12 | (M+Na)+ |
| 894.3006 | 1 | 10859.19 | C42H47N9O12 | (M+Na)+ |
| 895.3028 | 1 | 5284.43  | C42H47N9O12 | (M+Na)+ |
| 896.304  | 1 | 2237.01  | C42H47N9O12 | (M+Na)+ |

Figure S17. HRMS of Compound 2

Compound Table

| Compound Label          | RT    | Mass     | Abund | Formula          | Tgt Mass | Diff (ppm) |
|-------------------------|-------|----------|-------|------------------|----------|------------|
| Cpd 1: C43 H45 N9 O12 S | 5.972 | 911.2892 | 5519  | C43 H45 N9 O12 S | 911.2908 | -1.74      |

MS Zoomed Spectrum

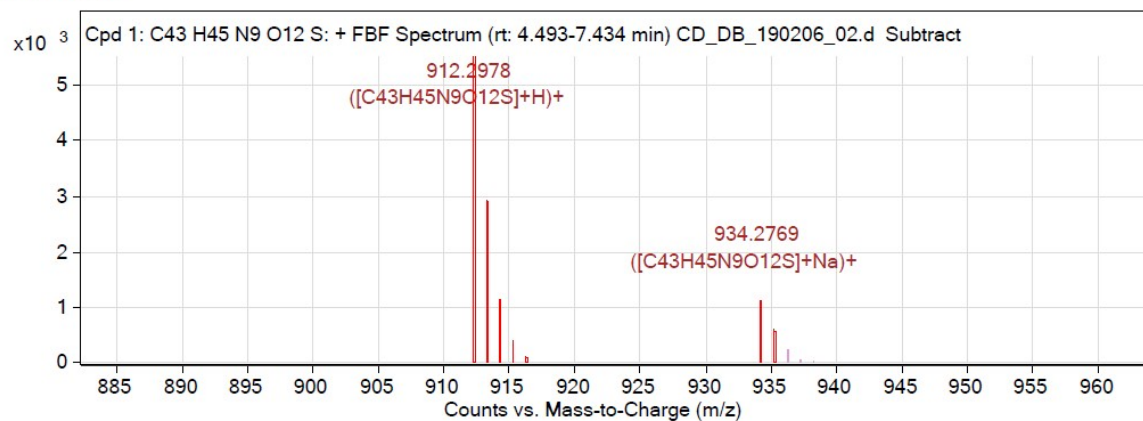

MS Spectrum Peak List

| m/z      | z | Abund   | Formula      | Ion     |
|----------|---|---------|--------------|---------|
| 912.2978 | 1 | 5518.52 | C43H45N9O12S | (M+H)+  |
| 913.3007 | 1 | 2926.74 | C43H45N9O12S | (M+H)+  |
| 914.2999 | 1 | 1135.67 | C43H45N9O12S | (M+H)+  |
| 915.2907 | 1 | 395.78  | C43H45N9O12S | (M+H)+  |
| 916.279  | 1 | 107.02  | C43H45N9O12S | (M+H)+  |
| 934.2769 | 1 | 1094.94 | C43H45N9O12S | (M+Na)+ |
| 935.2777 | 1 | 593.23  | C43H45N9O12S | (M+Na)+ |

Figure S18. HRMS of Compound 3

Compound Table

| Compound Label                                                       | RT    | Mass     | Abund  | Formula                                                       | Tgt Mass | Diff (ppm) |
|----------------------------------------------------------------------|-------|----------|--------|---------------------------------------------------------------|----------|------------|
| Cpd 1: C <sub>25</sub> H <sub>50</sub> N <sub>4</sub> O <sub>6</sub> | 0.115 | 502.3732 | 202787 | C <sub>25</sub> H <sub>50</sub> N <sub>4</sub> O <sub>6</sub> | 502.373  | 0.41       |

MS Zoomed Spectrum

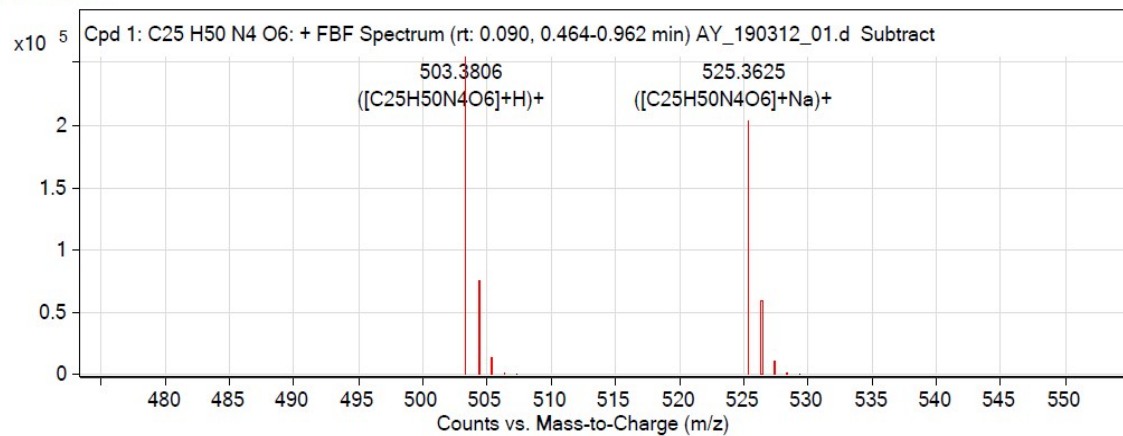

MS Spectrum Peak List

| m/z      | z | Abund     | Formula                                                       | Ion                 |
|----------|---|-----------|---------------------------------------------------------------|---------------------|
| 503.3806 | 1 | 254455.78 | C <sub>25</sub> H <sub>50</sub> N <sub>4</sub> O <sub>6</sub> | (M+H) <sup>+</sup>  |
| 504.3836 | 1 | 65923.58  | C <sub>25</sub> H <sub>50</sub> N <sub>4</sub> O <sub>6</sub> | (M+H) <sup>+</sup>  |
| 505.3861 | 1 | 12195.28  | C <sub>25</sub> H <sub>50</sub> N <sub>4</sub> O <sub>6</sub> | (M+H) <sup>+</sup>  |
| 506.3882 | 1 | 1613.74   | C <sub>25</sub> H <sub>50</sub> N <sub>4</sub> O <sub>6</sub> | (M+H) <sup>+</sup>  |
| 507.389  | 1 | 169.6     | C <sub>25</sub> H <sub>50</sub> N <sub>4</sub> O <sub>6</sub> | (M+H) <sup>+</sup>  |
| 525.3625 | 1 | 202787.02 | C <sub>25</sub> H <sub>50</sub> N <sub>4</sub> O <sub>6</sub> | (M+Na) <sup>+</sup> |
| 526.3653 | 1 | 56712.75  | C <sub>25</sub> H <sub>50</sub> N <sub>4</sub> O <sub>6</sub> | (M+Na) <sup>+</sup> |
| 527.3678 | 1 | 10332.87  | C <sub>25</sub> H <sub>50</sub> N <sub>4</sub> O <sub>6</sub> | (M+Na) <sup>+</sup> |
| 528.3703 | 1 | 1396.42   | C <sub>25</sub> H <sub>50</sub> N <sub>4</sub> O <sub>6</sub> | (M+Na) <sup>+</sup> |
| 529.3719 | 1 | 162.67    | C <sub>25</sub> H <sub>50</sub> N <sub>4</sub> O <sub>6</sub> | (M+Na) <sup>+</sup> |

Figure S19. HRMS of Compound 4

Compound Table

| Compound Label       | RT    | Mass     | Abund  | Formula       | Tgt Mass | Diff (ppm) |
|----------------------|-------|----------|--------|---------------|----------|------------|
| Cpd 1: C33 H57 N5 O8 | 0.135 | 651.4211 | 859526 | C33 H57 N5 O8 | 651.4207 | 0.63       |

MS Zoomed Spectrum

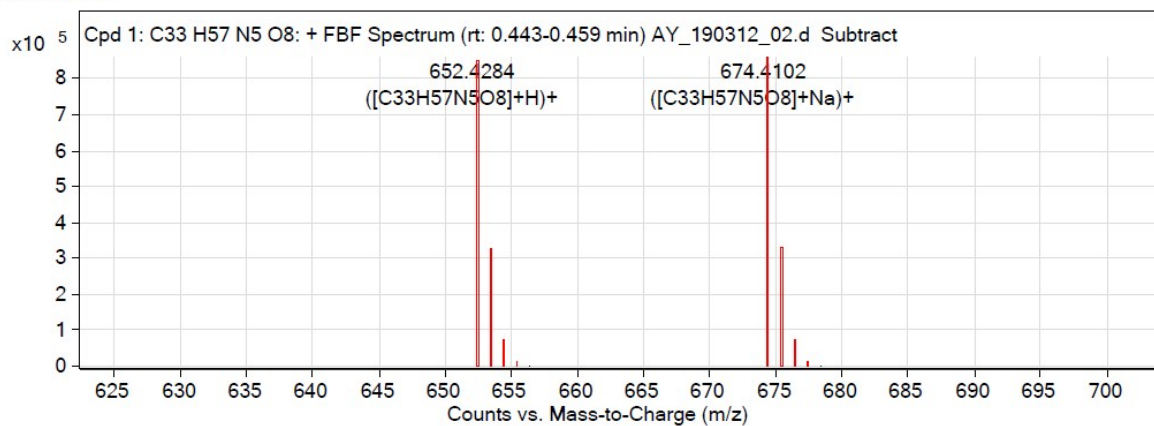

MS Spectrum Peak List

| m/z      | z | Abund     | Formula    | Ion     |
|----------|---|-----------|------------|---------|
| 652.4284 | 1 | 849852.94 | C33H57N5O8 | (M+H)+  |
| 653.4319 | 1 | 297926.72 | C33H57N5O8 | (M+H)+  |
| 654.4342 | 1 | 63774.71  | C33H57N5O8 | (M+H)+  |
| 655.4366 | 1 | 10315.5   | C33H57N5O8 | (M+H)+  |
| 656.4387 | 1 | 1462.34   | C33H57N5O8 | (M+H)+  |
| 674.4102 | 1 | 859525.94 | C33H57N5O8 | (M+Na)+ |
| 675.4136 | 1 | 306508.88 | C33H57N5O8 | (M+Na)+ |
| 676.4159 | 1 | 66397.7   | C33H57N5O8 | (M+Na)+ |
| 677.4181 | 1 | 10765.14  | C33H57N5O8 | (M+Na)+ |
| 678.4211 | 1 | 1767.19   | C33H57N5O8 | (M+Na)+ |

Figure S20. HRMS of Compound 5

Compound Table

| Compound Label        | RT    | Mass     | Abund  | Formula        | Tgt Mass  | Diff (ppm) |
|-----------------------|-------|----------|--------|----------------|-----------|------------|
| Cpd 1: C70 H71 N9 O12 | 0.109 | 1229.522 | 291642 | C70 H71 N9 O12 | 1229.5222 | -0.2       |

MS Zoomed Spectrum

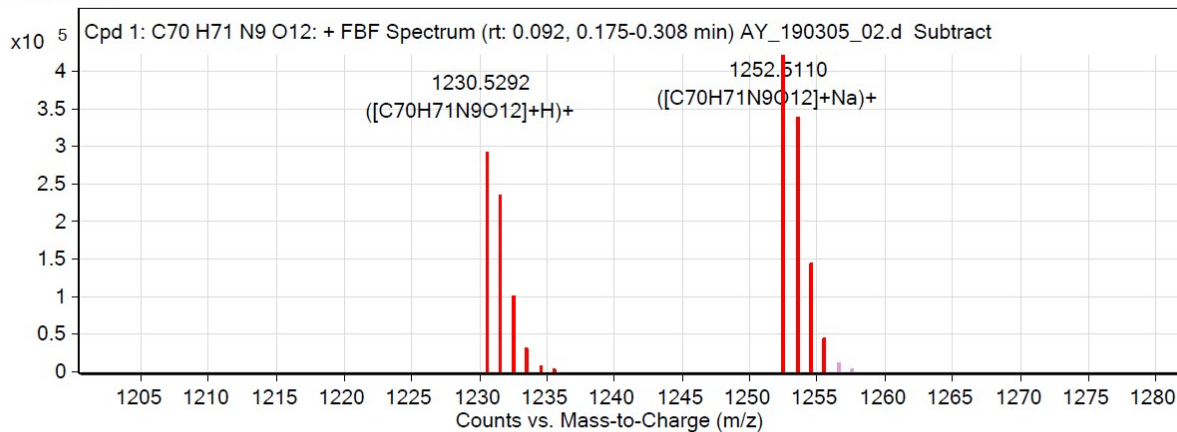

MS Spectrum Peak List

| m/z       | z | Abund     | Formula     | Ion     |
|-----------|---|-----------|-------------|---------|
| 1230.5292 | 1 | 291642.47 | C70H71N9O12 | (M+H)+  |
| 1231.5322 | 1 | 234697.89 | C70H71N9O12 | (M+H)+  |
| 1232.5354 | 1 | 96760.02  | C70H71N9O12 | (M+H)+  |
| 1233.5379 | 1 | 27606.99  | C70H71N9O12 | (M+H)+  |
| 1234.5437 | 1 | 7242.72   | C70H71N9O12 | (M+H)+  |
| 1235.5522 | 1 | 2086.66   | C70H71N9O12 | (M+H)+  |
| 1252.5111 | 1 | 421751.31 | C70H71N9O12 | (M+Na)+ |
| 1253.5144 | 1 | 322793.06 | C70H71N9O12 | (M+Na)+ |
| 1254.5179 | 1 | 143499.13 | C70H71N9O12 | (M+Na)+ |
| 1255.5205 | 1 | 42572.86  | C70H71N9O12 | (M+Na)+ |

Figure S21. HRMS of Compound 6



Author Contributions:

N. V. S. D. K. B is the principal investigator, lead the study, designed, conducted experiments on the new four step scheme and helped improve yields on 9-step synthesis

A. Y : conducted experiments to improve yields on 9-step synthesis; supervised undergraduates who also performed experiments to improve yields on 9-step synthesis

M. C: performed experiments represented in Tables 1,2 and Table S1 to improve yields on 9-step synthesis under guidance of A.Y.

J. A: performed experiments represented in Tables 1,2 and Table S1 to improve yields on 9-step synthesis under guidance of A.Y.

H. T. C: performed experiments on new four step synthesis under guidance of N.V.S.D.K.B.

K. M. T: performed experiments represented in Tables 1,2 and Table S1 to improve yields on 9-step synthesis.

M. A. D: provided leadership, direction and insight towards improvement on 9-step synthesis that made possible the experiments represented in Tables 1,2. Contributed to preparation of manuscript.

S. P: developed and implemented HPLC purification of final product.

J. W. B: provided guidance and direction on the purification of final product.

J. S. L: provided overall leadership, direction and focus of the entire project.

L. C. F: initiated entire project; provided day-to-day management; contributed to writing of manuscript.

C. M. D: provided leadership and hands-on direction of project, specifically the new four step synthesis and also improvements on the nine-step synthesis, provided guidance on outlining manuscript and writing of manuscript.

The manuscript was written by N. V. S. D. K. B; A. Y; L. C. F; and C.M.D.; and commented by all authors.
